# 1 RNA origami scaffolds as a cryo-EM tool for investigating aptamer- 2 ligand binding of a Broccoli-Pepper FRET pair

3  
4 Néstor Sampedro Vallina<sup>1\*</sup>, Ewan K.S. McRae<sup>1\*</sup>, Bente Kring Hansen<sup>1</sup>, Adrien Boussebayle<sup>1</sup>,  
5 Ebbe Sloth Andersen<sup>1,2\*\*</sup>

6  
7 <sup>1</sup>Interdisciplinary Nanoscience Center (iNANO), Gustav Wieds Vej 14, Aarhus University, DK-  
8 8000 Aarhus, Denmark. <sup>2</sup>Department of Molecular Biology and Genetics, Gustav Wieds Vej  
9 14, Aarhus University, DK-8000 Aarhus, Denmark.

10  
11 \*Shared first authors. \*\*To whom correspondence should be addressed: [esa@inano.au.dk](mailto:esa@inano.au.dk)

## 15 ABSTRACT

16 RNA nanotechnology uses motifs from nature as well as aptamers from in vitro selection to  
17 construct nanostructures and devices for applications in RNA medicine and synthetic biology.  
18 The RNA origami method allows cotranscriptional folding of large RNA scaffolds that can  
19 position functional motifs in a precise manner, which has been verified by Förster Resonance  
20 Energy Transfer (FRET) between fluorescent aptamers. Cryogenic electron microscopy (cryo-  
21 EM) is a promising method for characterizing the structure of larger RNA nanostructures.  
22 However, the structure of individual aptamers is difficult to solve by cryo-EM due to their low  
23 molecular weight. Here, we place aptamers on the RNA origami scaffolds to increase the  
24 contrast for cryo-EM and solve the structure of a new Broccoli-Pepper FRET pair. We identify  
25 different modes of ligand binding of the two aptamers and verify by selective probing. 3D  
26 variability analysis of the cryo-EM data show that the relative position between the two bound  
27 fluorophores on the origami fluctuate by only 3.5 Angstrom. Our results demonstrate the use  
28 of RNA origami scaffolds for characterizing small RNA motifs by cryo-EM and for positioning  
29 functional RNA motifs with high spatial precision. The Broccoli-Pepper apta-FRET pair has  
30 potential use for developing advanced sensors that are sensitive to small conformational  
31 changes.

32  
33 **Keywords:** FRET, fluorescence, RNA origami, RNA nanotechnology, cryo-EM, Broccoli,  
34 Pepper, scaffolding.

## 38 INTRODUCTION

39 The structural versatility of RNA makes it an ideal substrate for the design of functional  
40 nanodevices for applications in biotechnology and medicine. RNA's structural properties and  
41 ability to interact with proteins, other nucleic acids, and small molecules, allows for the precise  
42 spatial scaffolding of different molecular components<sup>1-3</sup>. Functional RNA scaffolds have been  
43 developed by incorporating ribozymes<sup>4</sup>, riboswitches<sup>5</sup> and small-molecule binding aptamers  
44<sup>6,7</sup>. RNA scaffolds bearing protein-binding domains have the potential to be genetically  
45 expressed and serve for synthetic biology purposes by localizing enzymes together to  
46 increase metabolic flux<sup>8,9</sup> or gene expression regulation<sup>10-12</sup>. RNA origami is a single-stranded  
47 RNA architecture based on the folding of RNA during transcription<sup>13,14</sup>. Produced isothermally,  
48 RNA origami nanostructures can be folded in high yield and be used for constructing  
49 genetically encodable RNA nanodevices. The modular design principles of this architecture  
50 allow for the precise spatial arrangement of different RNA motifs, which allows for the  
51 development of functional scaffolds<sup>6,11,12</sup>.

52 Using Cryo-EM, many biological structures have been solved with near atomic level  
53 resolution<sup>15-17</sup>. Large macromolecular complexes are more prone to favourable data  
54 acquisition due to high signal-to-noise ratio and identifiable asymmetric features. Smaller  
55 complexes (<50 kDa) remain difficult to visualize by cryo-EM due to low contrast and high  
56 background. RNA structures as small as 28 kDa have been recently solved using cryo-EM  
57 thanks to optimized sample preparation protocols<sup>18,19</sup>. A strategy based on homo-  
58 oligomerization of the target using kissing loops has recently been developed to increase  
59 molecular weight and mitigate flexibility<sup>20</sup>. Following this method, the structure of RNA targets  
60 such as the Tetrahymena group I Intron, the Azoarcus group I intron and the FMN riboswitch  
61 were solved at high resolution. An alternative strategy that has been used for proteins is to  
62 scaffold smaller structural targets on larger structures<sup>21,22</sup>. This can help optimize the folding  
63 and homogeneity of low molecular weight targets, as well as increase the signal-to-noise ratio  
64 while not interfering with the flexibility of the molecule. This strategy may also serve as a  
65 method for solving small RNA targets.

66 Förster resonance energy transfer (FRET) represents a versatile tool to characterize  
67 scaffolding effects and build devices sensitive to small structural changes, having applications  
68 in studies of localization of molecules and conformational changes<sup>23-26</sup>. Fluorogenic aptamers  
69 (FAs) are RNA sequences that interact with and activate fluorophores, reducing their non-  
70 radiative decay through vibrational and rotational relaxation by rigidifying their aromatic orbital  
71 systems<sup>27,28</sup>. RNA devices that incorporate FAs can be used to investigate structural  
72 dynamics of RNAs and to develop biosensors. We previously functionalized an RNA origami  
73 tile with Spinach and Mango aptamers, whose complexes with DFHBI and YO3-biotin acted

74 as a FRET donor and acceptor, respectively (named an apta-FRET system)<sup>6</sup>. The RNA  
75 origami scaffold with FAs rigidly incorporate the fluorophores leading to both a distance- and  
76 angle-dependency of the FRET efficiency<sup>29</sup>. Apta-FRET has also been demonstrated with the  
77 iSpinach and Mango-IV aptamers joined together by a single-stranded region<sup>30</sup>. Jeng et al.  
78 observed angular changes in an apta-FRET system and were able to sense the structural  
79 stabilization of a metal-ion binding riboswitch<sup>26</sup>. Geary et al. used RNA origami to demonstrate  
80 controlled positioning of Spinach and Mango aptamers and effects of helix length and flexibility  
81 on FRET efficiency<sup>14</sup>. All of the above apta-FRET systems used YO3-biotin as acceptor,  
82 however, this fluorophore has limited stability and high background when internalized by cells  
83<sup>6</sup> and its fluorescence has been shown to be weakly activated by Spinach<sup>30</sup>. Therefore, new  
84 aptamers and fluorophores with stable and bright properties are needed as acceptors to  
85 develop RNA FRET devices that can act inside cells.

86 Here, we use RNA origami to construct a new FRET pair using FAs, where the  
87 Broccoli/DFHBI-1T complex acts as a donor and the Pepper/HBC620 complex acts as an  
88 acceptor, and by tuning their relative positioning we obtain high FRET. Using cryo-EM single  
89 particle averaging methods, we reconstruct the apo and fluorophore-bound states of our RNA  
90 origami FRET pair to 4.5 Angstrom resolution. Supported by SHAPE probing experiments, we  
91 find that the Broccoli aptamer does not change shape upon ligand binding, while Pepper is  
92 rigidified upon ligand binding. Finally, we use 3D variability analysis of the particles isolated  
93 from the cryo-EM data to model the positional variance of the two fluorophores in the RNA  
94 scaffold and find that the Förster radius varies by only 3.5 Angstrom and is dominated by  
95 translational / non-rotational modes of movement. Our results demonstrate the use of a new  
96 FRET pair with FAs more suitable for in vivo applications and show that RNA origami scaffolds  
97 can be used for characterizing small RNA motifs by cryo-EM and for positioning functional  
98 RNA motifs with high spatial precision.

99

## 100 **RESULTS**

### 101 **FRET between Broccoli and Pepper aptamers**

102 To develop a new apta-FRET system with improved properties we suggest using the Broccoli  
103 and Pepper aptamers. The Broccoli aptamer is a shorter version of Spinach with improved  
104 folding in vivo<sup>31</sup> which, in complex with the DFHBI-1T fluorophore, has a reported excitation  
105 maximum at 485 nm and emission maximum at 505 nm<sup>32</sup>. The Pepper aptamer in complex  
106 with the fluorophore HBC620 has shown excellent fluorescent properties in vitro and in vivo,  
107 with reported excitation and emission maxima at 577 nm and 620 nm, respectively<sup>33</sup>. When  
108 placed in proximity, these two aptamers in complex with their cognate fluorophores represent

109 a promising FRET pair candidate (Fig. 1A), while being also potentially expressible and stable  
110 inside the cellular milieu.

111 We first experimentally analyzed the spectral properties of DFHBI-1T bound by  
112 Broccoli and HBC620 bound by Pepper (Fig. 1B). DFHBI-1T/Broccoli emission spectra and  
113 HBC620/Pepper excitation spectra were found to have a significant overlap, which is  
114 beneficial for FRET to occur. Furthermore, the broad excitation spectra of DFHBI-1T/Broccoli  
115 allows for excitation of the donor at 460 nm with negligible excitation of the acceptor  
116 (HBC620/Pepper). The minimal overlapping excitation spectra between DFHBI-1T and  
117 HBC620 results in minimal direct excitation of the acceptor (Fig. 1B, Supplementary Table 2).

118 To obtain FRET, we incorporated the Broccoli and Pepper aptamers onto a 3-helix  
119 RNA origami scaffold (Fig. 1C), similarly to the 2-helix apta-FRET scaffolds used by Jepsen  
120 et al.<sup>6</sup>. We designed five scaffolds with different aptamer placements to investigate the effect  
121 of donor and acceptor aptamer distance on FRET efficiency. The apta-FRET constructs are  
122 annotated as x,y-Bz-Pw, where x and y refer to the helix segment on which an aptamer is  
123 placed, and z and w refers to the distance in base pairs from the crossover on the RNA origami  
124 scaffold to Broccoli (B) and Pepper (P), respectively. In three constructs (1,2-B12P10, 1,2-  
125 B12P12, 1,2-B12P14), the aptamers were placed on helices 1 and 2 to put the fluorophores  
126 in close proximity, while varying the length of the stem before the Pepper aptamer (arrow in  
127 Fig. 1C) and keeping the Broccoli stem at 12 bp. In two constructs, the aptamers were placed  
128 on helices 1 and 3; from our in silico 3D modelling, 1,3-B12P12 places the aptamers at ~2 nm  
129 distance while 1,3-B12P(-34) places the aptamers at ~16 nm distance, the latter being outside  
130 FRET distance. The secondary structures and sequences for each design can be found in  
131 Supplementary Table 1.

132 The highest FRET output of  $37 \pm 0.4$  % was observed for the 1,2-B12-P12 design,  
133 since moving the Pepper aptamer to either the left (1,2-B12P10) or right (1,2-B12P14) of this  
134 position resulted in reduced FRET efficiency of  $34 \pm 0.04$  % and  $29 \pm 0.1$  %, respectively (Fig.  
135 1 D,E ,Supplementary Table 2). This decrease can either result from a distance effect or an  
136 oriented dipole effect as has been documented previously<sup>6,26</sup>. When placing the aptamers  
137 further apart on helix 1 and 3 in the 1,3-B12P12 design, we observe a FRET output of ~10%  
138 and when placing the aptamers outside FRET distance in the 1,3-B12P(-34) design, no FRET  
139 was observed (Fig. 1 D,E ,Supplementary Table 2). In conclusion, we have shown that DFHBI-  
140 1T/Broccoli and HBC620/Pepper function as a FRET pair with high FRET efficiency when  
141 located at an appropriate distance and orientation.

142

143

144

## 145 **Cryo-EM structure of Broccoli-Pepper scaffold in apo and bound states**

146

147 To better understand the relative positioning of the fluorescent aptamers on our RNA origami  
148 scaffold, we used cryo-EM single particle averaging methods to determine the structure of the  
149 1,2-B12P12 scaffold with and without fluorophores bound. Our cryo-EM data set for the Bound  
150 scaffold contained 5354 movies, resulting in a refined particle stack containing 150,704  
151 particles that produced a reconstruction with a GSFSC (0.143) resolution estimate of 4.43  
152 Angstrom (Supplementary Fig. 1 and Supplementary Table 3). The Apo scaffold dataset had  
153 only 1605 movies and resulted in a refined particle stack with 50,868 particles reaching a  
154 GSFSC (0.143) of 4.55 Angstrom (Supplementary Fig. 2).

155 The Apo- and Bound-scaffold overlap very well, with only slight positional variability in  
156 the aptamer regions (Fig. 2A). An unexpected curvature in the central helix of the scaffold  
157 results in the Pepper aptamer being below the plane of the scaffold (Fig. 2B, bottom, red  
158 motif). A slight curvature is also introduced at the stem of the Broccoli aptamer positioning it  
159 slight above the plane of the scaffold (Fig. 2B, bottom, green motif). Although the local  
160 resolution of the Broccoli aptamer ranges from 8.0 to 9.5 Angstrom for the apo state and 5.5  
161 to 8.7 for the bound state, the overall shapes of the two states are similar, indicating that the  
162 G-quadruplex structure is not affected by the ligand binding (Fig. 2C). Removal of the ligand  
163 from our Broccoli model and refinement into our Apo-map results in the displacement of the  
164 adenine-uracil base pair that normally stacks on top of the ligand. This base pair now stacks  
165 directly on top of the final G-quartet, changing the angle of the terminal helix and,  
166 consequently, the major groove opposing the ligand-binding pocket is narrowed from 13.6  
167 Angstrom in the Bound model to 9.2 Angstrom in our Apo model (indicated by dashed line in  
168 Fig. 2C).

169 In contrast, the Pepper aptamer is missing or has weak signal from key ligand-binding  
170 regions in the apo state that are clearly present in the bound state (Fig. 2D). Specifically, J3/2  
171 (Fig. 3A), which forms the side of the ligand binding pocket, has weaker signal than the bound  
172 state at similar map thresholds. The local resolution for J3/2 reaches 7 Angstrom for the bound  
173 state, but only 9 Angstrom for the apo state. Furthermore, at a map threshold approximating  
174 9 Angstrom resolution, 145 atoms from J3/2 are outside the contour of the Apo map. Whereas  
175 at a map threshold approximating 7.5 Angstrom, 0 atoms from J3/2 are outside the contour of  
176 the Bound map. At this threshold level of ~9 Angstroms the Apo reconstruction terminates at  
177 the ligand binding site and the P1 helix is not observed until the threshold is extended to  
178 observe features of up to 10.5 angstrom local resolution. In comparison, the entire P1 helix is  
179 contained within the bound state reconstruction at a threshold level equivalent to 8.5 Angstrom  
180 local resolution. In conclusion, the cryo-EM data allows us to observe a major rigidification of  
181 the Pepper aptamer upon ligand binding.

182 Comparing the per-residue cross-correlation (CC) values from our models and their  
183 respective EM reconstructions shows that we can model each residue with similar confidence  
184 in both the apo and bound state, except for the Pepper aptamer, which has lower CC values  
185 in the Apo model (Supplementary Fig. 3). Although these differences observed in the Pepper  
186 aptamer from our cryo-EM analysis could be due to a lesser number of particles being  
187 available during data processing for the apo state, the similarity in the Broccoli-containing  
188 regions and subsequent SHAPE analysis confirms what we have observed in the EM  
189 reconstructions.

190

### 191 **SHAPE probing of Pepper reveals cooperative binding of HBC**

192 We performed SHAPE analysis on the Pepper aptamer in the absence and presence of 3  
193 Pepper ligands: HBC485, HBC497, and HBC620 (Fig. 3 A,B, Supplementary Fig. 6). The  
194 junction regions J3/2, J2/1 and J1/2 were observed to have high SHAPE reactivity in the  
195 absence of the ligand and low SHAPE reactivity in the presence of the ligands indicating that  
196 the junction nucleotides cooperatively bind the ligands (Fig. 3 B,C). Inside the junction regions,  
197 we observed negligible difference in SHAPE reactivity between the three ligands tested,  
198 confirming that the mode of binding is conserved as indicated by the previously determined  
199 crystal structures <sup>34</sup>.

200 Low SHAPE reactivity was observed for the first nucleotide (C4) from J3/2 both in the  
201 absence and presence of ligands (Fig. 3 B,C). From the crystal structure <sup>34</sup> and our EM data  
202 we would expect this to be one of the more dynamic residues as it has no hydrogen bonding  
203 partner and is only supported by base stacking from one adjacent nucleotide. The three next  
204 nucleotides (position 5-7) show significant flexibility in the apo-structure that is attenuated in  
205 the ligand bound state. The final three nucleotides of J3/2 (position 8-10) show complete loss  
206 of SHAPE reactivity upon ligand binding, supporting their interaction in the deep groove of P2  
207 and role in forming the ligand binding site. C8 shows the lowest reactivity of these nucleotides  
208 in the apo state, indicating that it could be transiently sampling the ligand bound conformation.

209 The U15-G40 base pair forms the bottom of the ligand binding site and is stable in both  
210 the apo and bound states. C8 and G39 form the left side of the binding pocket (Fig. 3D,E) and  
211 are both SHAPE reactive in the apo state but less reactive in the presence of ligand (Fig. 3C).  
212 The top of the ligand binding pocket is formed by the mixed-base tetrad G16-U17-C18-U38  
213 (Fig. 3D,E). G16 and U17 from J2/1 as well as U38 from J1/2 are SHAPE reactive in the  
214 unbound state but lose reactivity in the bound state, while C18 from J2/1 is unreactive in the  
215 apo state but reactive in the bound state (Fig. 3C). This suggests that C18 is stacked inside  
216 the helix in the absence of ligand but gets displaced when the ligand enters its binding site. In  
217 the crystal structure, C18 has one hydrogen bond to U17, but is on the exterior of the helix



218 with no stacking partner (Fig. 3E) and is flexible as indicated by a high B-factor. The mixed-  
219 base tetrad is stabilized by stacking on the G19-C37 base pair. These nucleotides are both  
220 unreactive in the unbound and bound state, indicating that the base pairing observed in the  
221 crystal structure is maintained in the absence of ligand. A36 from J1/2 is reactive in the apo  
222 form and stabilized in the bound state, confirming its role in stabilizing the binding pocket by  
223 stacking on top of G16 (Fig. 3D,E).

224 Nucleotide C35 and C44 have an apparent increased SHAPE reactivity in the  
225 presence of some of the ligands, but since these positions are involved in base pairs in the  
226 crystal structure, they should not be SHAPE reactive. We observe bands corresponding to  
227 C35 and C44 in the mock lane (M in Fig. 3B) that are likely the result of premature termination  
228 of the reverse transcriptase (RT) at stable RNA structures. This is supported by C44 being  
229 positioned at the 3' of P2 and C35 at the 3' of P1. The C35 and C44 bands appear more  
230 intensely in the Benzoyl Cyanide treated samples, suggesting an increase in termination due  
231 to the chemical modification. For C44, it is observed that HBC485 and HBC487 have similar  
232 intensity as with no ligand, but that HBC620 has a higher signal, which can be explained by  
233 its stronger binding affinity (HBC485 KD=8.0 nM, HBC497 KD=6.7 nM, HBC620 KD=6.1 nM)  
234 <sup>34</sup>. For C35, we observe that HBC485 terminates at a similar level to no ligand, while HBC487  
235 and HBC620 have a higher signal. Again, this fits with the binding strengths of the  
236 fluorophores.

237 We found that the Pepper junction regions are flexible in the apo state and become  
238 more structured in the bound state. The bound state fits very well the crystal structure. Also,  
239 from RT termination we see evidence of differential stabilization by the ligands. Our SHAPE  
240 data shows that even though the P1 helix is not apparent in our apo cryo-EM map, it is stable  
241 in the apo state. The lack of rigidity from the J3/2, J2/1 and J1/2 nucleotides likely result in a  
242 large amount of dynamics in the apo state that is averaged out during the single particle  
243 averaging analysis. Together, the cryo-EM and SHAPE data show that the Pepper aptamer  
244 undergoes significant structural rigidification upon ligand binding.

245

### 246 **Cryo-EM reveals conformational variability of FRET pair**

247

248 In previous apta-FRET experiments it was observed that using longer stems to position the  
249 aptamers resulted on lower FRET efficiency, which suggests that the most variable regions of  
250 RNA origami are the termini of the helical components <sup>6,14</sup>, bringing into question how precisely  
251 we can position the RNA motifs that we place at these variable positions. A partially cleaned  
252 particle stack from the Bound data set, with 241,297 particles, was used to perform 3D  
253 variability analysis (3DVA). Principal component analysis revealed three major movements,  
254 which corresponded to a density increase in the Pepper aptamer (PC0), movement of the

255 Pepper aptamer (PC1) and movement of the Broccoli aptamer (PC2) (Fig. 4A, left,  
256 Supplementary Movie 1). The fluctuation of Pepper density observed in PC0 may correspond  
257 to the on-off binding of HBC620. For PC1 and PC2, we observe a continuous out-of-plane  
258 movement of the Pepper and Broccoli aptamers, respectively (Fig. 4A, right, Supplementary  
259 Movie 1). With the variability analysis we can identify the positional extrema of both the Pepper  
260 and Broccoli aptamers (Fig. 4B), which in turn allows us to determine the position of the  
261 fluorophores.

262 By rigid-body fitting the crystal structures of the aptamers into the reconstructions we  
263 can determine the relative positions of the fluorophores for each of the extrema conformations.  
264 Then, while keeping the relative position of DFHBI-1T to HBC620 intact, we align the HBC620  
265 models (Fig. 4C). For apta-FRET systems the fluorophore's dipole moments are oriented in  
266 relation to each other and this orientation has a strong effect on FRET<sup>26,29</sup>. We observe that  
267 the rotational orientation of the two fluorophores has little variation between the extrema  
268 positions, which is explained by the fixation of the aptamers on the RNA origami scaffold (Fig.  
269 4B). The distance between fluorophores also has a strong effect on FRET efficiency<sup>29</sup>. From  
270 our data we can see that the range of motion of a given fluorophore is close to ~16 Angstrom.  
271 However, if we measure the distance between HBC620 and DFHBI-1T over the range of  
272 motion we see that the actual fluorophore distance ranges from 30.5 to 34.0 Angstrom. Thus,  
273 the range of probable distances for the two fluorophores has a variance of only ~3.5 Angstrom,  
274 demonstrating that the current RNA origami paradigm allows us to position these two small  
275 molecules with sub-nanometer precision. Furthermore, since the distribution of particles  
276 across the reaction coordinates can be approximated as Gaussian (Fig. 4A, right), and  
277 therefore inform on the energy landscape of the particles, the majority of the population of  
278 molecules will be in an intermediate state, only sampling these extrema transiently.

279

## 280 **DISCUSSION**

281 In this study we used RNA origami design tools<sup>14</sup> to position the Broccoli<sup>31</sup> and Pepper<sup>33</sup>  
282 aptamers at a close distance, generating a novel apta-FRET pair with comparable efficiency  
283 to our previously reported apta-FRET system<sup>6,14</sup>. RNA origami design allows us to control the  
284 spatial orientation of the fluorophores and can thus be used to study the effects of dipole  
285 moment orientation and distance on FRET efficiency<sup>29</sup>. The RNA origami designs used in this  
286 study arranges helices in a near-parallel manner, which results in a parallel positioning of  
287 aptamers and bound fluorophores. In another study, a metal-binding junction was used to  
288 place the aptamers at a non-parallel angle<sup>26</sup>. By rationally designing RNA nanostructures of  
289 different geometries, it will be possible to explore the full range of dipole orientations. Apta-  
290 FRET systems can be used to create RNA devices that detect small conformational changes



291 and be used to develop ratiometric biosensors<sup>35</sup>. The apta-FRET system that we introduce in  
292 this study can also serve as basis for designing intracellular sensors, since the Broccoli and  
293 Pepper aptamers have both been independently verified to activate the fluorescence of their  
294 cognate fluorophores inside cells<sup>31,33,36</sup>.

295 By combining cryo-EM and chemical probing methods we have obtained novel  
296 structural information about the unbound states of the Broccoli and Pepper fluorescent  
297 aptamers. This information can be further used to design improved Pepper aptamers with less  
298 flexibility, or to design a switchable Pepper aptamer where the flexible regions are  
299 sequestered by tertiary motifs, trapping the aptamer in an inactive state. Furthermore, the  
300 structural characterization of our RNA origami scaffolded apta-FRET system confirms that our  
301 in-silico design process can accommodate fluorescent aptamer motifs and still produce high-  
302 fidelity designer sequences that can fold cotranscriptionally into the predicted structure.

303 Due to low signal-to-noise ratios, small structural RNA targets can present a challenge  
304 for cryo-EM structure determination<sup>18</sup>. Here, the RNA origami scaffold increases the size of  
305 the structural RNA targets and aids in the structural determination of the Broccoli and Pepper  
306 aptamers. Similarly, RNA origami can aid in structural determination of other interesting RNA  
307 motifs. An oligomerization approach using kissing loops has been used to characterize RNA-  
308 only targets by increasing their molecular weight and mitigate flexibility to aid in cryo-EM  
309 structure determination, obtaining a high resolution<sup>20</sup>. However, similarly to crystallography,  
310 this approach can limit the natural flexibility and structural variability of the particles and even  
311 constrain them into artefactual conformations. In our approach, the RNA particles can be in  
312 their unconstrained solution conformation and therefore, the flexibility of the scaffold can be  
313 studied.

314 Since we obtained the cryo-EM map before the publication of the Pepper crystal  
315 structures<sup>34</sup>, we attempted structure determination using the DRRAFTER pipeline<sup>37,38</sup>. The  
316 models generated reached a mean pairwise RMSD (convergence) of 3.5 Angstrom, and out  
317 of the top 10 models, 9 had the correct strand path for J3/2. Since DRRAFTER cannot  
318 consider small molecule ligands, it was unable to recapitulate the ligand binding pocket and  
319 accurately place the ligand. When using a map simulated from the atoms at 5 Angstrom  
320 resolution in ChimeraX, the x-ray structure and DRRAFTER model both correlate comparably  
321 well (0.88) to our experimental EM map (data not shown). This shows that while de novo  
322 model building methods can accurately trace the backbone of complex RNA motifs into low  
323 resolution maps, caution should be taken when interpreting the base positions from such  
324 methods, especially in cases where non nucleic acid ligands are present.

325 In summary, the RNA origami architecture represents a versatile tool for scaffolding  
326 and combining RNA aptamers and other motifs with sub-nanometer precision, aiding in cryo-  
327 EM studies and presenting opportunities for further development of functional scaffolds.

## 328 **MATERIALS AND METHODS**

### 329 **RNA sequence design**

330 The RNA origami sequence design pipeline is extensively explained in Geary et al.<sup>14</sup>. Briefly,  
331 using a standard text editor, the different structural motifs were incorporated and routed on a  
332 single strand. The fluorogenic aptamers, as well as specific 3' and 5' -end primer binding  
333 regions ending in GGA (an optimal initiation sequence for the T7 RNA polymerase) were  
334 incorporated as sequence constrains. The sequences matching the specified constrains were  
335 then generated using the perl script "batch-revolvr.pl" from the ROAD package<sup>14</sup>, available at  
336 <https://github.com/esa-lab/ROAD>.

337

### 338 **Synthesis of DNA templates**

339 The DNA templates for the different RNA designs were produced by PCR amplification using  
340 Phusion High-Fidelity DNA polymerase (NEB) of double stranded gene fragments (gBlocks)  
341 synthesized by Integrated DNA Technologies (IDT). Amplifications were performed in 100  $\mu$ l  
342 reactions containing 1X Phusion HF buffer (NEB), 1  $\mu$ M of each primer (ordered from IDT),  
343 200  $\mu$ M dNTPs (Invitrogen), 4 ng of gBlock template and 1 Unit of Phusion DNA polymerase.  
344 The reaction was subjected to a 2-minute initial denaturation at 98°C, followed by 30 cycles  
345 of: 98°C for 10s, 68°C for 15s and 72°C for 10s, followed by a final extension step at 72°C of  
346 2 minutes and cooling down to 10°C. The amplicons were purified using NucleoSpin Gel and  
347 PCR Clean-up kit (Macherey-Nagel) following the manufacturer's instructions.

348

### 349 **In vitro production and purification of RNA**

350 RNA was produced by in vitro transcription. In a volume of 500  $\mu$ L, 2-3  $\mu$ g purified DNA  
351 template was mixed with transcription buffer (40 mM HEPES pH 7.5, 20 mM MgCl<sub>2</sub>, 50 mM  
352 KCL, 2 mM Spermidine), 10 mM NTPs (2.5 mM each), 10 mM DTT, 0.4 U/ $\mu$ L RiboLock  
353 Inhibitor (Thermo Scientific) and in-house produced T7 RNA polymerase. The reaction was  
354 incubated at 37°C overnight and stopped by adding 2 Units of DNase I (NEB) and incubating  
355 at 37°C for 15 minutes. The reactions were centrifuged at 17,000 RCF for 10 min to pellet the  
356 precipitated pyrophosphate. The supernatant was loaded onto a Superose 6 size exclusion  
357 column (GE Healthcare) equilibrated with 40 mM HEPES pH 7.5, 50 mM KCL and 5 mM  
358 MgCl<sub>2</sub>.

359

### 360 **Fluorescence measurements**

361 Excitation and emission spectra of the aptamer-fluorophore complexes were identified with  
362 spectral scan measurements on a CLARIOstar Plus multi-mode microplate reader (BMG  
363 LABTECH). All fluorescence measurements were performed at room temperature on sample

364 volumes of 50  $\mu$ l containing 100 nM RNA, 500 nM DFHBI-1T (Lucerna Technologies), 500 nM  
365 HBC620 (FR Biotechnology), 40 mM HEPES, 50 mM KCl and 5 mM MgCl<sub>2</sub> using a  
366 CLARIOstar Plus multi-mode microplate reader (BMG LABTECH). Excitation of DFHBI-1T  
367 was performed at 460 nm and emission was recorded at 505 nm. Excitation of HBC620 was  
368 performed at 580 nm and emission was recorded at 620 nm. Fluorescence coming from the  
369 FRET was obtained by exciting at 460 nm and collecting at 620 nm.

370

### 371 **FRET output calculation**

372 FRET was calculated using the following formula <sup>6</sup>:

$$373 \text{ FRET} = \frac{IDA(\text{exD emA}) - A_{dir} * IDA(\text{exA emA}) - D_{Leak} * IDA(\text{exD emD})}{IDA(\text{exD emA}) - A_{dir} * IDA(\text{exA emA}) - D_{Leak} * IDA(\text{exD emD}) + IDA(\text{exD emD})}$$

$$374 \text{ where } D_{Leak} = \frac{ID(\text{exD emA})}{ID(\text{exD emD})} \text{ and } A_{dir} = \frac{IA(\text{exD emA})}{IA(\text{exA emA})}.$$

375 The excitation at DFHBI-1T or HBC620 wavelength is denoted with exD (460 nm) or exA (585  
376 nm), respectively. The emission measured at DFHBI-1T or HBC620 wavelength is denoted  
377 with emD (505 nm), emA (620 nm), respectively. ID, IA and IDA refer to intensities measured  
378 in the presence of DFHBI-1, HBC620 and both fluorophores respectively.

379

### 380 **Cryo-EM sample preparation**

381 Purified RNA (pre-incubated with fluorophores at a 1:5 molar ratio, or not) was spin  
382 concentrated to ~2.5 mg/ml in Amicon centrifugal filters with molecular cutoff weights of 10  
383 kDa at 21 °C. Protochips AU-Flat 1.2/1.3 300 mesh grids were purchased from Jena  
384 Bioscience. Immediately prior to use the grids were glow discharged for 45 seconds with a  
385 current of 15 mA in a Pelca EasiGlow. A Leica GP2 was used for plunge-freezing, the sample  
386 chamber was kept at 15 degrees and 100% humidity. 3  $\mu$ L of sample was applied to the gold  
387 foil and, after a delay of 4 seconds, blotted onto a double layer of Whatman number 1 filter  
388 paper for 6 seconds of total blot time followed by immediate plunging into liquid ethane (~ -  
389 184 °C).

390

### 391 **Cryo-EM data collection and single particle analysis**

392 All data were acquired at 300 keV on a Titan Krios G3i (Thermo Fisher Scientific) equipped  
393 with a K3 camera (Gatan/Ametek) and energy filter operated in EFTEM mode using a slit width  
394 of 20 eV. The data were collected over a defocus range of -0.5 to -2 micrometers with a  
395 targeted dose of 60 e-/Å<sup>2</sup>. Automated data collection was performed with EPU and the data  
396 saved as gain normalized compressed tiff files with a pixel size of 0.645 Å/px.

397 All data were pre-processed using CS-Live to apply motion correction, CTF fitting and  
398 initial particle picking <sup>39</sup>. The rest of the analysis was performed in cryoSPARC V3.31. For the  
399 ligand bound dataset templated particle picking using 50 templates generated from an ab initio

400 reconstruction resulted in 729,630 particles, which were extracted with box size of 592 and  
401 Fourier cropped to 174 pixels. 3-class ab initio reconstruction using 30,000 particles resulted  
402 in 2 junk and 1 good class. Heterogeneous refinement was used to sort the particle stack into  
403 1 good (reaching Nyquist) and 2 junk classes (see workflow in Supplementary Fig. 4). The  
404 241,297 particles from the “good” class were used for 3D Variability Analysis (3DVA) solving  
405 for 3 orthogonal principal modes and a filter resolution of 7 Angstrom <sup>40</sup>. These 241,297  
406 particles were re-extracted with a box size of 592 and Fourier cropped to 296 pixels. The  
407 resultant 233,171 particles were used to start a 5-class ab initio reconstruction followed by  
408 heterogeneous refinement using the 5 ab initio reconstructions. The two best classes, totaling  
409 150,204 particles, were combined and refined by homogeneous refinement followed by a local  
410 refinement using the mask from the homogeneous refinement job to attain the final particle  
411 alignments and reconstruction. Re-extracting the particles with a box size of 432, Fourier  
412 cropped to 216 pixels, and repeating the last two refinement steps improved both the map  
413 quality and GSFSC curve.

414 For the apo dataset a similar workflow was followed, resulting in 478,981 particle picks.  
415 A single round of 3D classification with 3-class ab initio reconstruction followed by  
416 heterogeneous refinement resulted in a refined particle stack of 51,278 particles. These  
417 particles were re-extracted with a box size of 432 and Fourier cropped to 216 pixels.  
418 Homogeneous refinement followed by local refinement with the mask from the previous  
419 homogeneous refinement job was used to attain the final particle alignments and  
420 reconstruction (see workflow in Supplementary Fig. 5).  
421 The Local Resolution Estimation job in cryoSPARC was used to generate a local resolution  
422 mask that was applied to a locally filtered map in chimeraX.

423

## 424 **Model building**

425 The core components of the RNA origami scaffold were generated using the ROAD software.  
426 The kissing loops were replaced with the kissing loop from helix 3 of another RNA origami  
427 (PDB: 7PTQ). The iSpinach aptamer (PDB: 5OB3) <sup>41</sup> was used as a starting template for  
428 Broccoli and the crystal structure of the Pepper aptamer bound to HBC620 (PDB: 7EOP) <sup>34</sup>  
429 was used as the starting template for Pepper. The components were manually placed into the  
430 cryo-EM volume in ChimeraX <sup>42-44</sup>, the individual components were joined using the “make  
431 bond” command from the ISOLDE <sup>45</sup> add-on to ChimeraX. The resulting PDB file was re-  
432 numbered using the PDB-Tools pdb-reres program <sup>46</sup> and then the correctly numbered PDB  
433 file was sequence corrected in ChimeraX using the swapNA command. The model was then  
434 massaged into the cryo-EM volume using Molecular Dynamics Flexible Fitting (MDFF) with  
435 VMD using ISOLDE with a “temperature” of 0 degrees and a substantially reduced forcefield  
436 weight set <sup>45</sup>. This model was then passed through real space refinement (RSR) in Phenix <sup>47-</sup>

437 <sup>49</sup> using default parameters to optimize the backbone angles. As a final step the model was  
438 energy minimized with QRNAS <sup>50</sup> and iterated between Phenix RSR and QRNAS with  
439 positional restraints to allow the regions with bad clashes to be modified by QRNAS. Validation  
440 of the goodness of fit between model and map were performed using the Phenix validation  
441 tool <sup>49,51,52</sup>.

442

#### 443 **SHAPE analysis of the Pepper aptamer**

444 For the investigation of the secondary structure of the Pepper aptamer, the construct with the  
445 F30 scaffold <sup>33</sup> fused to Pepper was selected. RNA was transcribed from a PCR amplified  
446 template containing three guanosyl residues at the 5'-end to facilitate transcription using T7  
447 polymerase. For this, a long single stranded oligonucleotide (F30\_Pepper\_tplt) was designed  
448 as a template containing the full sequence and was amplified with two oligonucleotides  
449 (T7\_Prom\_Fwd and F30\_Pepper\_Rev) using Q5 High-fidelity DNA polymerase (NEB)  
450 according to the manufacturer's instructions. 50  $\mu$ L of the PCR reaction were used for a 500  
451  $\mu$ L in vitro transcription with T7 RNA polymerase (produced in-house). The transcription mix  
452 contain 200 mM Tris-HCl (pH=8), 40 mM DTT, 16 mM NTPs (4 mM each), 20 mM MgCl<sub>2</sub>, 2  
453 mM spermidine, 10  $\mu$ L of T7 polymerase and 20,000 units of RNase inhibitor (ThermoFischer).  
454 Transcription was run overnight at 37°C and RNA was purified on a 6% denaturing PAGE.

455 After purification, the RNA concentration was determined using DS 11 Series  
456 spectrophotometer (Denovix). For each reaction, 10 pmol of RNA was used. In total, 5 different  
457 reactions were setup. A control reaction (mock) that did not undergo any SHAPE treatment, a  
458 sample without HBC dye (neg) and three samples containing one of the fluorophores (HBC  
459 485, 497 or 620), respectively. All RNAs were mixed in a buffer containing 40 mM HEPES pH  
460 7, 50 mM KCL, 5 mM MgCl<sub>2</sub> and incubated at 65°C for 5 min, followed by a 5 min incubation  
461 at room temperature. 4  $\mu$ L of dye at 50  $\mu$ M was mixed in their corresponding tubes (485, 497  
462 and 620) and 4  $\mu$ L of DMSO anhydrous was added to the mock and neg samples. Samples  
463 were incubated 5 min at room temperature before each being transferred into an Eppendorf  
464 tube containing either DMSO (mock) or 5  $\mu$ L of 2 M Benzoyl Cyanide. As the chemical  
465 modification is done after 1 s <sup>53</sup>, the samples were ethanol precipitated and resuspended into  
466 9  $\mu$ L of MQ water.

467 For the primer extension, a 2X master mix was prepared containing 2.5X SSII buffer,  
468 500  $\mu$ M dNTPs, 1.5  $\mu$ M Alexa647 modified reverse primer (Rev\_Shape\_Alexa647) and 20 mM  
469 DTT. 10  $\mu$ L of this mix was added to the 9  $\mu$ L of RNA. For the sequencing lanes of the gel, 4  
470 samples containing 10 pmol of RNA were prepared, containing each a different ddNTP at 500  
471  $\mu$ M. All the samples were heated up at 65°C for 5 min, then 5 min at 35°C followed by 5 min  
472 at 25°C. 1  $\mu$ L of SSII (ThermoFischer) was added to each tube. The samples were incubated  
473 1 min at 45°C, 20 min at 52°C and 5 min at 65°C before being kept at 4°C. Once the cDNA



474 synthesis was over, the remaining RNA was degraded by adding 1  $\mu$ L of 4 M NaOH and  
475 incubated 5 min at 95°C. All samples were ethanol precipitated and resuspended in 15  $\mu$ L of  
476 loading buffer (97% formamide and 20 mM EDTA).

477 For the observation of the result, a 12% PAGE (40 cm x 20 cm x 0.07 cm) was cast.  
478 Prior loading, all samples were heated up at 95°C for 3 min before being snapped cool on ice  
479 for 3 min. After 15 min of running at 1000 V, 3  $\mu$ L of the samples (mock, neg, 485, 497 and  
480 620) and 1.5  $\mu$ L of the sequencing samples were loaded on the gel. After 5h of migration, the  
481 gel was scanned on a Typhoon FLA-9500.

482 Reactivity was calculated by measuring the peak intensity of each band using the  
483 ImageJ software. Each sample was normalized based on their signal intensity of the C28. This  
484 nucleotide is located in the P1 apical tetraloop, far from the binding region and is assumed to  
485 have no reactivity variation upon target binding due to the inherent stability of a UUGC  
486 tetraloop.

487

## 488 **DATA AVAILABILITY**

489 The atomic coordinates for the 1,2-B12P12 RNA origami scaffolds in the bound and apo states  
490 have been deposited in the PDB (<https://www.rcsb.org/>) under the PDB ID 7ZJ4 and 7ZJ5,  
491 respectively. The volumes from the final refinements of our cryo-EM SPA datasets have been  
492 deposited to the ePDB under accession codes EMDB-14740 and EMDB-17471. Other data  
493 are available from the corresponding author upon request.

494

## 495 **FUNDING**

496 N. S. V. received funding from the European Union's Horizon 2020 Research and Innovation  
497 Program under the Marie Skłodowska-Curie grant agreement n° 765703. E. K. S. M. was  
498 supported by the Independent Research Fund Denmark under the Research Project 1 grant  
499 (9040-00425B) and the Canadian Natural Sciences and Engineering Research Council  
500 (532417). Computational resources for the project were in part supported by the Carlsberg  
501 Foundation Research Infrastructure grant (CF20-0635). B. K. H. was supported by a PhD  
502 scholarship from Innovation Foundation Denmark. E.S.A. acknowledges support by a  
503 European Research Council (ERC) Consolidator grant (683305) and Novo Nordisk  
504 Foundation Ascending Investigator grant (0060694) supporting A.B.

505

## 506 **ACKNOWLEDGEMENTS**

507 We thank Mette Jepsen for insightful discussions and Rita Rosendahl and Claus Bus for  
508 technical assistance.



509

510 **CONTRIBUTION**

511 N. S. V., B. K. H., E. K. S. M. and E. S. A. conceptualized the project and designed the  
512 experiments. N. S. V. and B. K. H. designed the RNAs and performed the FRET  
513 experiments. E. K. S. M. performed the cryo-EM characterization and analysis. A. B.  
514 performed the SHAPE probing experiments. N. S. V., E. K. S. M. and E. S. A. wrote the  
515 manuscript.

516 **ETHICS DECLARATION**

517 The authors declare no competing interests.

518

## 519 REFERENCES

- 520 1. Myhrvold, C. & Silver, P. A. Using synthetic RNAs as scaffolds and regulators. *Nature*  
521 *Structural & Molecular Biology* **22**, 8-10 (2015). <https://doi.org/10.1038/nsmb.2944>
- 522 2. Grabow, W. & Jaeger, L. RNA modularity for synthetic biology. *F1000Prime Rep* **5**, 46-  
523 46 (2013). <https://doi.org/10.12703/P5-46>
- 524 3. Afonin, K. A. *et al.* Multifunctional RNA nanoparticles. *Nano Lett* **14**, 5662-5671  
525 (2014). <https://doi.org/10.1021/nl502385k>
- 526 4. Oi, H. *et al.* Programmable formation of catalytic RNA triangles and squares by  
527 assembling modular RNA enzymes. *The Journal of Biochemistry* **161**, 451-462 (2017).  
528 <https://doi.org/10.1093/jb/mvw093>
- 529 5. Porter, E. B., Polaski, J. T., Morck, M. M. & Batey, R. T. Recurrent RNA motifs as  
530 scaffolds for genetically encodable small-molecule biosensors. *Nat Chem Biol* **13**,  
531 295-301 (2017). <https://doi.org/10.1038/nchembio.2278>
- 532 6. Jepsen, M. D. E. *et al.* Development of a genetically encodable FRET system using  
533 fluorescent RNA aptamers. *Nature Communications* **9**, 18 (2018).  
534 <https://doi.org/10.1038/s41467-017-02435-x>
- 535 7. Chopra, A., Sagredo, S., Grossi, G., Andersen, E. S. & Simmel, F. C. Out-of-Plane  
536 Aptamer Functionalization of RNA Three-Helix Tiles. *Nanomaterials* **9**, 507 (2019).
- 537 8. Delebecque, C. J., Lindner, A. B., Silver, P. A. & Aldaye, F. A. Organization of  
538 Intracellular Reactions with Rationally Designed RNA Assemblies. *Science* **333**, 470-  
539 474 (2011). <https://doi.org/10.1126/science.1206938>
- 540 9. Sachdeva, G., Garg, A., Godding, D., Way, J. C. & Silver, P. A. In vivo co-localization of  
541 enzymes on RNA scaffolds increases metabolic production in a geometrically  
542 dependent manner. *Nucleic Acids Res* **42**, 9493-9503 (2014).  
543 <https://doi.org/10.1093/nar/gku617>
- 544 10. Zalatan, Jesse G. *et al.* Engineering Complex Synthetic Transcriptional Programs with  
545 CRISPR RNA Scaffolds. *Cell* **160**, 339-350 (2015).  
546 <https://doi.org/https://doi.org/10.1016/j.cell.2014.11.052>
- 547 11. Nguyen, M. T. A., Pothoulakis, G. & Andersen, E. S. Synthetic Translational Regulation  
548 by Protein-Binding RNA Origami Scaffolds. *ACS Synthetic Biology* (2022).  
549 <https://doi.org/10.1021/acssynbio.1c00608>
- 550 12. Pothoulakis, G., Nguyen, M. T. A. & Andersen, Ebbe S. Utilizing RNA origami scaffolds  
551 in *Saccharomyces cerevisiae* for dCas9-mediated transcriptional control. *Nucleic*  
552 *Acids Research* (2022). <https://doi.org/10.1093/nar/gkac470>
- 553 13. Geary, C., Rothmund, P. W. K. & Andersen, E. S. A single-stranded architecture for  
554 cotranscriptional folding of RNA nanostructures. *Science* **345**, 799-804 (2014).  
555 <https://doi.org/10.1126/science.1253920>
- 556 14. Geary, C., Grossi, G., McRae, E. K. S., Rothmund, P. W. K. & Andersen, E. S. RNA  
557 origami design tools enable cotranscriptional folding of kilobase-sized nanoscaffolds.  
558 *Nature Chemistry* **13**, 549-558 (2021). <https://doi.org/10.1038/s41557-021-00679-1>

- 559 15. Fitzpatrick, A. W. P. *et al.* Cryo-EM structures of tau filaments from Alzheimer's  
560 disease. *Nature* **547**, 185-190 (2017). <https://doi.org/10.1038/nature23002>
- 561 16. Gremer, L. *et al.* Fibril structure of amyloid- $\beta$ (1–42) by cryo-electron microscopy.  
562 *Science* **358**, 116-119 (2017). <https://doi.org/10.1126/science.aao2825>
- 563 17. Wrapp, D. *et al.* Cryo-EM structure of the 2019-nCoV spike in the prefusion  
564 conformation. *Science* **367**, 1260-1263 (2020).  
565 <https://doi.org/10.1126/science.abb2507>
- 566 18. Zhang, K. *et al.* Cryo-EM structure of a 40 kDa SAM-IV riboswitch RNA at 3.7 Å  
567 resolution. *Nature Communications* **10**, 5511 (2019).  
568 <https://doi.org/10.1038/s41467-019-13494-7>
- 569 19. Zhang, K. *et al.* Cryo-EM and antisense targeting of the 28-kDa frameshift stimulation  
570 element from the SARS-CoV-2 RNA genome. *Nature Structural & Molecular Biology*  
571 **28**, 747-754 (2021). <https://doi.org/10.1038/s41594-021-00653-y>
- 572 20. Liu, D., Th  lot, F. A., Piccirilli, J. A., Liao, M. & Yin, P. Sub-3-Å cryo-EM structure of  
573 RNA enabled by engineered homomeric self-assembly. *Nature Methods* (2022).  
574 <https://doi.org/10.1038/s41592-022-01455-w>
- 575 21. Liu, Y., Gonen, S., Gonen, T. & Yeates, T. O. Near-atomic cryo-EM imaging of a small  
576 protein displayed on a designed scaffolding system. *Proceedings of the National*  
577 *Academy of Sciences* **115**, 3362 (2018). <https://doi.org/10.1073/pnas.1718825115>
- 578 22. Liu, Y., Huynh, D. T. & Yeates, T. O. A 3.8 Å resolution cryo-EM structure of a small  
579 protein bound to an imaging scaffold. *Nature Communications* **10**, 1864 (2019).  
580 <https://doi.org/10.1038/s41467-019-09836-0>
- 581 23. Asher, W. B. *et al.* Single-molecule FRET imaging of GPCR dimers in living cells.  
582 *Nature Methods* **18**, 397-405 (2021). <https://doi.org/10.1038/s41592-021-01081-y>
- 583 24. Hellenkamp, B. *et al.* Precision and accuracy of single-molecule FRET  
584 measurements—a multi-laboratory benchmark study. *Nature Methods* **15**, 669-676  
585 (2018). <https://doi.org/10.1038/s41592-018-0085-0>
- 586 25. F  rster, T. Zwischenmolekulare Energiewanderung und Fluoreszenz. *Annalen der*  
587 *Physik* **437**, 55-75 (1948).  
588 <https://doi.org/https://doi.org/10.1002/andp.19484370105>
- 589 26. Jeng, S. C. Y. *et al.* Fluorogenic aptamers resolve the flexibility of RNA junctions using  
590 orientation-dependent FRET. *Rna* **27**, 433-444 (2021).  
591 <https://doi.org/10.1261/rna.078220.120>
- 592 27. Grate, D. & Wilson, C. Laser-mediated, site-specific inactivation of RNA transcripts.  
593 *Proceedings of the National Academy of Sciences* **96**, 6131 (1999).  
594 <https://doi.org/10.1073/pnas.96.11.6131>
- 595 28. Babendure, J. R., Adams, S. R. & Tsien, R. Y. Aptamers Switch on Fluorescence of  
596 Triphenylmethane Dyes. *Journal of the American Chemical Society* **125**, 14716-14717  
597 (2003). <https://doi.org/10.1021/ja037994o>
- 598 29. Clegg, R. M. Fluorescence resonance energy transfer and nucleic acids. *Methods*  
599 *Enzymol* **211**, 353-388 (1992). [https://doi.org/10.1016/0076-6879\(92\)11020-j](https://doi.org/10.1016/0076-6879(92)11020-j)

- 600 30. Trachman, R. J., III *et al.* Structure-Guided Engineering of the Homodimeric Mango-IV  
601 Fluorescence Turn-on Aptamer Yields an RNA FRET Pair. *Structure* **28**, 776-785.e773  
602 (2020). <https://doi.org/10.1016/j.str.2020.04.007>
- 603 31. Filonov, G. S., Moon, J. D., Svensen, N. & Jaffrey, S. R. Broccoli: Rapid Selection of an  
604 RNA Mimic of Green Fluorescent Protein by Fluorescence-Based Selection and  
605 Directed Evolution. *Journal of the American Chemical Society* **136**, 16299-16308  
606 (2014). <https://doi.org/10.1021/ja508478x>
- 607 32. Song, W., Strack, R. L., Svensen, N. & Jaffrey, S. R. Plug-and-Play Fluorophores Extend  
608 the Spectral Properties of Spinach. *Journal of the American Chemical Society* **136**,  
609 1198-1201 (2014). <https://doi.org/10.1021/ja410819x>
- 610 33. Chen, X. *et al.* Visualizing RNA dynamics in live cells with bright and stable  
611 fluorescent RNAs. *Nature Biotechnology* **37**, 1287-1293 (2019).  
612 <https://doi.org/10.1038/s41587-019-0249-1>
- 613 34. Huang, K. *et al.* Structure-based investigation of fluorogenic Pepper aptamer. *Nature*  
614 *Chemical Biology* (2021). <https://doi.org/10.1038/s41589-021-00884-6>
- 615 35. Wu, R. *et al.* Ratiometric Fluorogenic RNA-Based Sensors for Imaging Live-Cell  
616 Dynamics of Small Molecules. *ACS Applied Bio Materials* **3**, 2633-2642 (2020).  
617 <https://doi.org/10.1021/acsabm.9b01237>
- 618 36. Wu, R. *et al.* Genetically Encoded Ratiometric RNA-Based Sensors for Quantitative  
619 Imaging of Small Molecules in Living Cells. *Angewandte Chemie International Edition*  
620 **58**, 18271-18275 (2019). <https://doi.org/https://doi.org/10.1002/anie.201911799>
- 621 37. Kappel, K. *et al.* De novo computational RNA modeling into cryo-EM maps of large  
622 ribonucleoprotein complexes. *Nature Methods* **15**, 947-954 (2018).  
623 <https://doi.org/10.1038/s41592-018-0172-2>
- 624 38. Kappel, K. *et al.* Accelerated cryo-EM-guided determination of three-dimensional  
625 RNA-only structures. *Nature Methods* **17**, 699-707 (2020).  
626 <https://doi.org/10.1038/s41592-020-0878-9>
- 627 39. Punjani, A., Rubinstein, J. L., Fleet, D. J. & Brubaker, M. A. cryoSPARC: algorithms for  
628 rapid unsupervised cryo-EM structure determination. *Nature Methods* **14**, 290-296  
629 (2017). <https://doi.org/10.1038/nmeth.4169>
- 630 40. Punjani, A. & Fleet, D. J. 3D variability analysis: Resolving continuous flexibility and  
631 discrete heterogeneity from single particle cryo-EM. *J Struct Biol* **213**, 107702 (2021).  
632 <https://doi.org/10.1016/j.jsb.2021.107702>
- 633 41. Fernandez-Millan, P., Autour, A., Ennifar, E., Westhof, E. & Ryckelynck, M. Crystal  
634 structure and fluorescence properties of the iSpinach aptamer in complex with  
635 DFHBI. *Rna* **23**, 1788-1795 (2017). <https://doi.org/10.1261/rna.063008.117>
- 636 42. Pettersen, E. F. *et al.* UCSF Chimera—A visualization system for exploratory research  
637 and analysis. *Journal of Computational Chemistry* **25**, 1605-1612 (2004).  
638 <https://doi.org/10.1002/jcc.20084>
- 639 43. Goddard, T. D. *et al.* UCSF ChimeraX: Meeting modern challenges in visualization and  
640 analysis. *Protein Sci* **27**, 14-25 (2018). <https://doi.org/10.1002/pro.3235>

- 641 44. Pettersen, E. F. *et al.* UCSF ChimeraX: Structure visualization for researchers,  
642 educators, and developers. *Protein Sci* **30**, 70-82 (2021).  
643 <https://doi.org/10.1002/pro.3943>
- 644 45. Croll, T. ISOLDE: a physically realistic environment for model building into low-  
645 resolution electron-density maps. *Acta Crystallographica Section D* **74**, 519-530  
646 (2018). <https://doi.org/doi:10.1107/S2059798318002425>
- 647 46. Rodrigues, J. P. G. L. M., Teixeira, J. M. C., Trellet, M. & Bonvin, A. M. J. J. pdb-tools: a  
648 swiss army knife for molecular structures. *F1000Res* **7**, 1961-1961 (2018).  
649 <https://doi.org/10.12688/f1000research.17456.1>
- 650 47. Liebschner, D. *et al.* Macromolecular structure determination using X-rays, neutrons  
651 and electrons: recent developments in Phenix. *Acta Crystallogr D Struct Biol* **75**, 861-  
652 877 (2019). <https://doi.org/10.1107/S2059798319011471>
- 653 48. Terwilliger, T. C. *et al.* Model morphing and sequence assignment after molecular  
654 replacement. *Acta Crystallogr D Biol Crystallogr* **69**, 2244-2250 (2013).  
655 <https://doi.org/10.1107/S0907444913017770>
- 656 49. Afonine, P. V. *et al.* New tools for the analysis and validation of cryo-EM maps and  
657 atomic models. *Acta Crystallogr D Struct Biol* **74**, 814-840 (2018).  
658 <https://doi.org/10.1107/s2059798318009324>
- 659 50. Stasiewicz, J., Mukherjee, S., Nithin, C. & Bujnicki, J. M. QRNAS: software tool for  
660 refinement of nucleic acid structures. *BMC Struct Biol* **19**, 5 (2019).  
661 <https://doi.org/10.1186/s12900-019-0103-1>
- 662 51. Williams, C. J. *et al.* MolProbity: More and better reference data for improved all-  
663 atom structure validation. *Protein Sci* **27**, 293-315 (2018).  
664 <https://doi.org/10.1002/pro.3330>
- 665 52. Richardson, J. S., Williams, C. J., Videau, L. L., Chen, V. B. & Richardson, D. C.  
666 Assessment of detailed conformations suggests strategies for improving cryoEM  
667 models: Helix at lower resolution, ensembles, pre-refinement fixups, and validation  
668 at multi-residue length scale. *J Struct Biol* **204**, 301-312 (2018).  
669 <https://doi.org/10.1016/j.jsb.2018.08.007>
- 670 53. Mortimer, S. A. & Weeks, K. M. Time-Resolved RNA SHAPE Chemistry. *Journal of the*  
671 *American Chemical Society* **130**, 16178-16180 (2008).  
672 <https://doi.org/10.1021/ja8061216>
- 673  
674



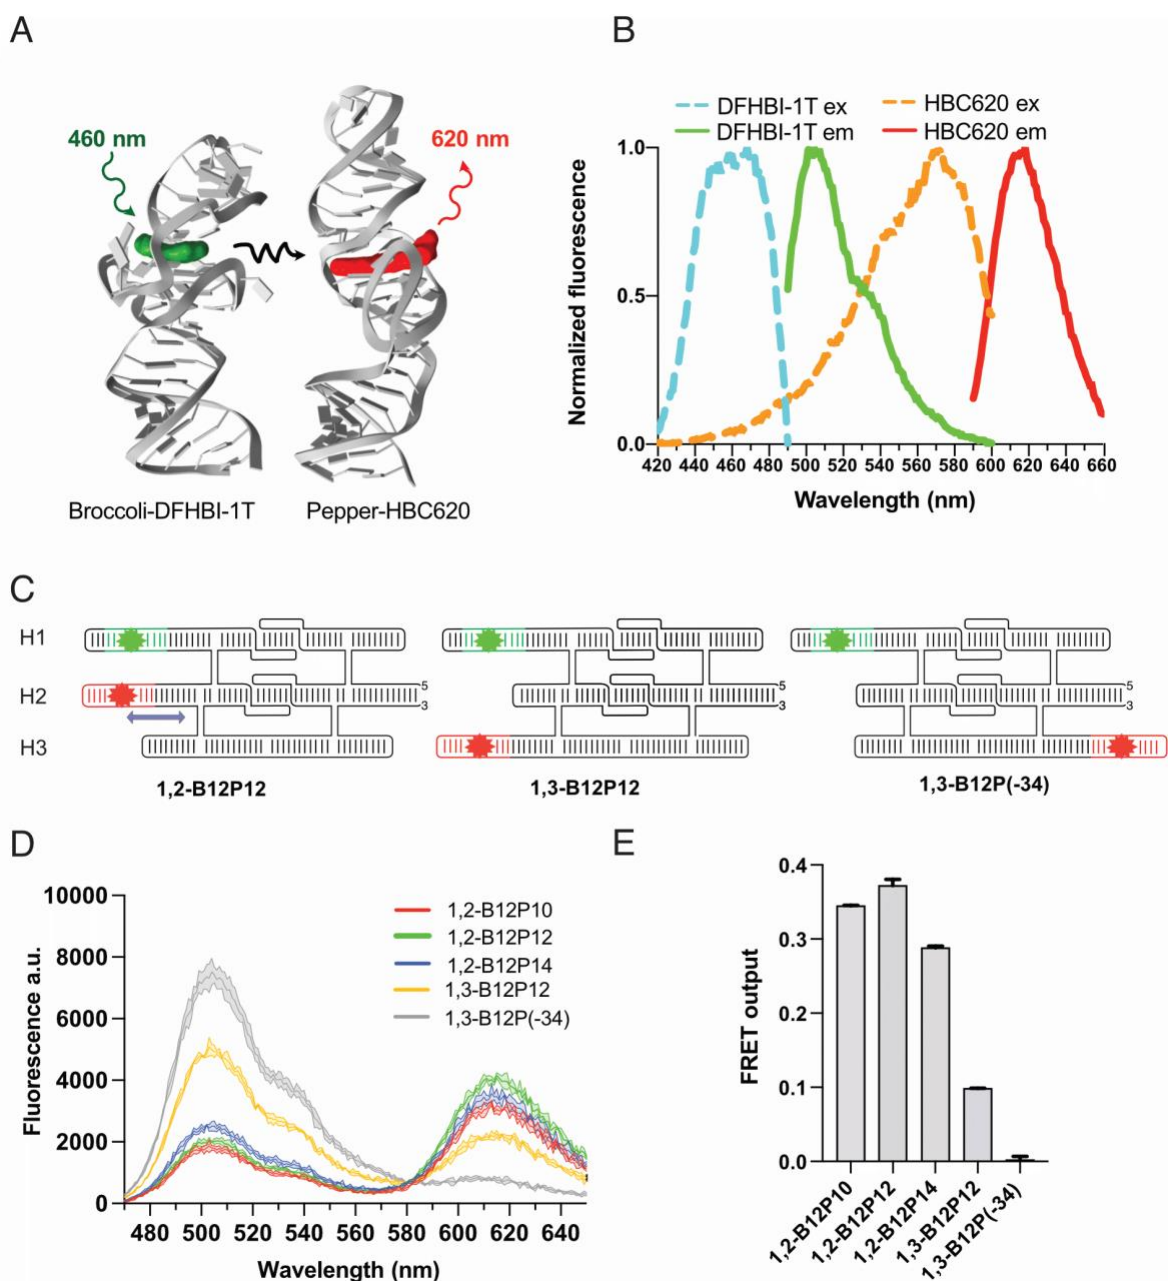

675  
 676 **Fig. 1. FRET between Broccoli and Pepper aptamers.** (A) Structural model of Broccoli  
 677 and Pepper aptamers shown in cartoon format with their cognate fluorophores DFHBI-1T  
 678 (green) and HBC620 (red) shown as spheres. Excitation, energy transfer and emission  
 679 illustrated as wavy lines. (B) Measured excitation and emission spectra of DFHBI-1T and  
 680 HBC620 in complex with their cognate aptamers. (C) Depiction of RNA origami tiles with  
 681 different arrangements of the fluorogenic aptamers. (D) FRET output measured after 30  
 682 mins upon addition of the fluorophores (1  $\mu$ M) to the RNA origami tiles (100 nM). Measured  
 683 fluorescence spectra at 460 nm excitation. Data corresponds to 3 technical replicates,  
 684 shown as mean  $\pm$  SD. (E) Calculated absolute FRET output measured at 460 nm excitation  
 685 and 620 nm emission. Data corresponds to 3 technical replicates, shown as mean  $\pm$  SD.  
 686



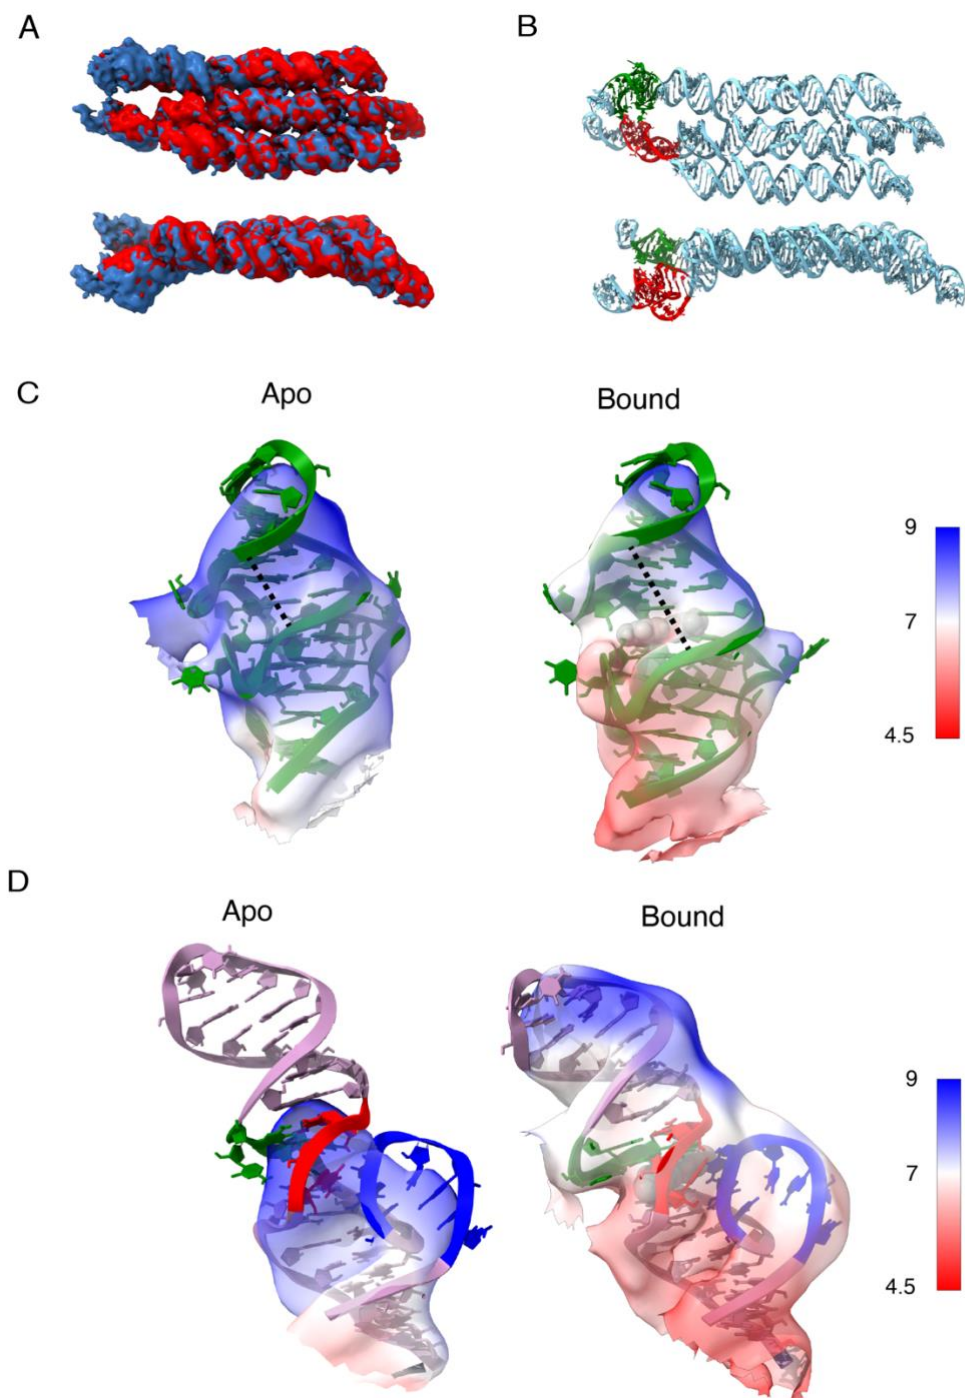

687  
688 **Fig. 2. Cryo-EM structure of Pepper and Broccoli aptamers in apo and bound states.**  
689 (A) Overlay of the cryo-EM maps of the apo (red) and ligand bound (blue) 1,2-B12P12. (B)  
690 Atomistic model built into the ligand bound cryo-EM map of 1,2-B12P12 showing the Broccoli  
691 (green) and Pepper (red) aptamer locations. (C) Close up view of the Broccoli aptamer in the  
692 apo and DFHBI bound cryo-EM maps. (D) Close up view of the Pepper aptamer in the apo  
693 and HBC620 bound cryo-EM maps.  
694

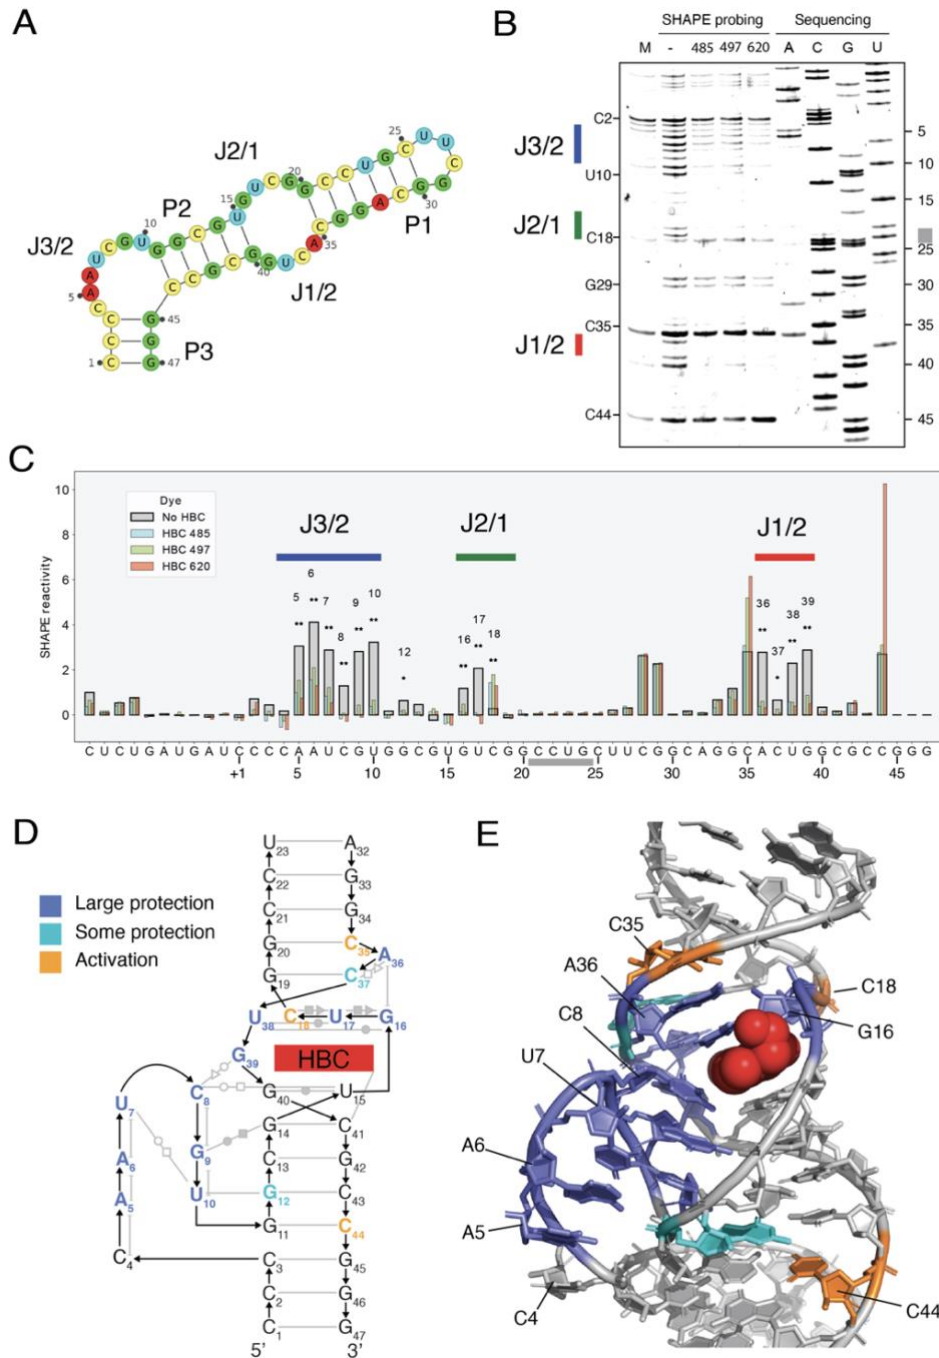

695  
 696 **Fig. 3. SHAPE probing of the Pepper aptamer in apo and bound states.** (A) Secondary  
 697 structure blueprint for Pepper with the labelling used in the text. (B) SHAPE gel analysis of  
 698 pepper aptamer in the apo and HBC 485, 497 and 620 bound states. Grey marking in  
 699 sequencing lane indicates compressed area. (C) Quantitative per-nucleotide SHAPE  
 700 reactivity analysis for Pepper aptamer in the apo and ligand bound states. Signals are  
 701 normalized by the signal at the non-binding C28 position. (D) Tertiary structure of the Pepper  
 702 aptamer (PDB ID: 7EOP). Structure diagram showing tertiary elements: Base pairs are  
 703 shown as grey lines with Leontis-Westhof annotation of non-Watson-Crick base pairs. Base  
 704 pair planes are indicated by horizontal alignment. Stacking is indicated by vertical alignment.  
 705 Protection is marked as colors on nucleotides. (E) Atomic structure shown with protection  
 706 colored on nucleotides showing that the whole binding pocket gets stabilized upon ligand  
 707 binding. HBC 620 shown in red sphere representation.

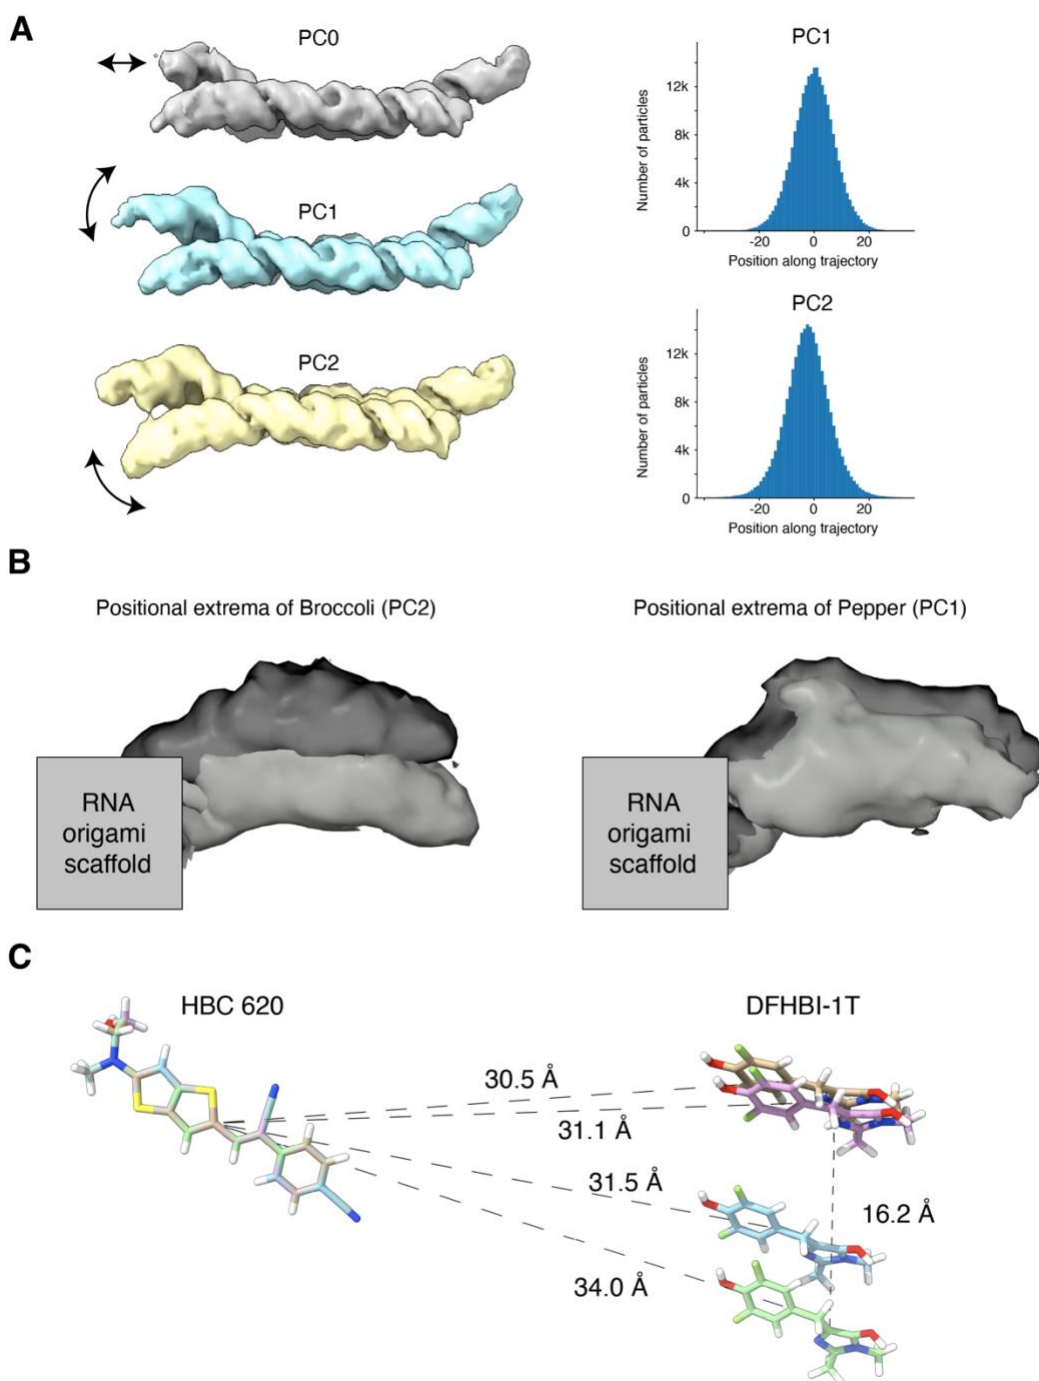

708  
709 **Fig. 4. Cryo-EM 3D variability analysis of Pepper and Broccoli aptamers.** (A)  
710 Representative structures are shown for the principal component analysis (PC0, PC1 and  
711 PC2). Arrows indicate the most prominent movements. Gaussian distribution of particles  
712 along two principal reaction coordinates (PC1, PC2) determined by 3DVA (right). (B)  
713 Intermediate reconstructions using particle subsets from the extremes of PC0 and PC1 show  
714 the positional variability of broccoli and pepper aptamers. (C) HBC ligands from pepper were  
715 aligned while maintaining the spatial relationship with the DFHBI ligand from Broccoli from  
716 the extrema reconstructions. Distances from HBC to the center of each DFHBI were  
717 measured as well as the furthest distance between DFHBI fluorophores.  
718
